# Supplementary material for: Division of Labor by the HELQ, BLM, and FANCM Helicases during Homologous Recombination Repair in Drosophila melanogaster
Source: MDPI journal article supplement (doi:10.3390/genes13030474), 2022-03-08
Supplement: s1 [file s1]

**Supplemental Table S1:**  
**p-values of genotypic comparisons for SDSA + LTR annealing repair events**

Figure 3A

| Genotype         | <i>wild type</i> | <i>helq</i> | <i>blm</i> | <i>helq blm</i> |  |
|------------------|------------------|-------------|------------|-----------------|--|
| <i>wild type</i> | X                | < 0.0001    | < 0.0001   | < 0.0001        |  |
| <i>helq</i>      | X                | X           | > 0.99     | 0.55            |  |
| <i>blm</i>       | X                | X           | X          | 0.04            |  |
| <i>helq blm</i>  | X                | X           | X          | X               |  |
|                  |                  |             |            |                 |  |

Figure 4A

| Genotype         | <i>wild type</i> | <i>fancm</i> | <i>blm</i> | <i>blm fancm</i> |  |
|------------------|------------------|--------------|------------|------------------|--|
| <i>wild type</i> | X                | < 0.0001     | < 0.0001   | < 0.0001         |  |
| <i>fancm</i>     | X                | X            | 0.005      | 0.10             |  |
| <i>blm</i>       | X                | X            | X          | 0.96             |  |
| <i>blm fancm</i> | X                | X            | X          | X                |  |
|                  |                  |              |            |                  |  |

Figure 5A

| Genotype          | <i>wild type</i> | <i>helq</i> | <i>fancm</i> | <i>helq fancm</i> |  |
|-------------------|------------------|-------------|--------------|-------------------|--|
| <i>wild type</i>  | X                | <0.0001     | <0.0001      | <0.0001           |  |
| <i>helq</i>       | X                | X           | 0.20         | 0.18              |  |
| <i>fancm</i>      | X                | X           | X            | 0.99              |  |
| <i>helq fancm</i> | X                | X           | X            | X                 |  |
|                   |                  |             |              |                   |  |

p-values were calculated with the Kruskal-Wallis test with Dunn's multiple comparisons, using GraphPad Prism 9 software. Comparisons with  $p < 0.05$  are highlighted in yellow.

**Supplemental Table S2:  
p-values of genotypic comparisons for aborted SDSA repair events**

Figure 3B

| Genotype         | <i>wild type</i> | <i>helq</i> | <i>blm</i> | <i>helq blm</i> |  |
|------------------|------------------|-------------|------------|-----------------|--|
| <i>wild type</i> | X                | < 0.0001    | < 0.0001   | < 0.0001        |  |
| <i>helq</i>      | X                | X           | 0.006      | 0.19            |  |
| <i>blm</i>       | X                | X           | X          | > 0.99          |  |
| <i>helq blm</i>  | X                | X           | X          | X               |  |
|                  |                  |             |            |                 |  |

Figure 4B

| Genotype         | <i>wild type</i> | <i>fancm</i> | <i>blm</i> | <i>blm fancm</i> |  |
|------------------|------------------|--------------|------------|------------------|--|
| <i>wild type</i> | X                | 0.25         | < 0.0001   | 0.0001           |  |
| <i>fancm</i>     | X                | X            | < 0.001    | 0.0083           |  |
| <i>blm</i>       | X                | X            | X          | 0.89             |  |
| <i>blm fancm</i> | X                | X            | X          | X                |  |
|                  |                  |              |            |                  |  |

Figure 5B

| Genotype          | <i>wild type</i> | <i>helq</i> | <i>fancm</i> | <i>helq fancm</i> |  |
|-------------------|------------------|-------------|--------------|-------------------|--|
| <i>wild type</i>  | X                | < 0.0001    | 0.63         | 0.005             |  |
| <i>helq</i>       | X                | X           | < 0.0001     | 0.48              |  |
| <i>fancm</i>      | X                | X           | X            | 0.03              |  |
| <i>helq fancm</i> | X                | X           | X            | X                 |  |
|                   |                  |             |              |                   |  |

p-values were calculated with the Kruskal-Wallis test with Dunn's multiple comparisons, using GraphPad Prism 9 software. Comparisons with  $p < 0.05$  are highlighted in yellow.

**Supplemental Table S3:  
p-values of genotypic comparisons for repair synthesis tract lengths**

Figure 3C

| Genotypic comparison    | Minimum number of base pairs synthesized |          |          |          |        |
|-------------------------|------------------------------------------|----------|----------|----------|--------|
|                         | 5                                        | 250      | 1000     | 2400     | 4600   |
| <i>wild type / helq</i> | 0.29                                     | 0.14     | 0.0002   | 0.0042   | 0.0004 |
| <i>wild type / blm</i>  | 0.0012                                   | 0.0023   | < 0.0001 | < 0.0001 | 0.033  |
| <i>helq / blm</i>       | 0.044                                    | 0.14     | 0.23     | 0.0015   | 0.210  |
| <i>helq / helq,blm</i>  | < 0.0001                                 | < 0.0001 | < 0.0001 | < 0.0001 | 0.68   |
| <i>blm / helq,blm</i>   | 0.0004                                   | < 0.0001 | 0.0001   | 0.026    | 0.097  |

Figure 4C

| Genotypic comparison     | Minimum number of base pairs synthesized |      |          |          |       |
|--------------------------|------------------------------------------|------|----------|----------|-------|
|                          | 5                                        | 250  | 1000     | 2400     | 4600  |
| <i>wild type / fancm</i> | 0.11                                     | 0.12 | 0.038    | 0.15     | 0.13  |
| <i>wild type / blm</i>   | 0.064                                    | N.D. | < 0.0001 | < 0.0001 | 0.011 |
| <i>fancm / blm</i>       | 1.0                                      | N.D. | 0.098    | 0.0026   | 0.43  |
| <i>fancm / blm,fancm</i> | 1.0                                      | 0.13 | 0.0069   | 0.0068   | 1.0   |
| <i>blm / blm,fancm</i>   | 1.0                                      | N.D. | 0.21     | 1.0      | 1.0   |

Figure 5C

| Genotypic comparison      | Minimum number of base pairs synthesized |          |          |          |        |
|---------------------------|------------------------------------------|----------|----------|----------|--------|
|                           | 5                                        | 250      | 1000     | 2400     | 4600   |
| <i>wild type / fancm</i>  | 0.11                                     | 0.12     | 0.038    | 0.15     | 0.13   |
| <i>wild type / helq</i>   | 0.29                                     | 0.14     | 0.0002   | 0.0042   | 0.0004 |
| <i>fancm / helq</i>       | 0.58                                     | 0.81     | 0.40     | 0.41     | 0.23   |
| <i>helq / helq,fancm</i>  | 0.80                                     | < 0.0001 | < 0.0001 | < 0.0001 | 0.26   |
| <i>fancm / helq,fancm</i> | 0.79                                     | 0.0019   | < 0.0001 | < 0.0001 | 0.025  |

Two-tailed p-values were calculated with Fisher's exact test, using GraphPad Prism 9 software. N.D. = no data. Comparisons with p<0.05 are highlighted in yellow.
